# Supplementary material for: How Toll-like Receptor 9 Plays a Key Role in the Development of Gastric Cancer and Is Linked to Epstein–Barr Virus Infection
Source: MDPI journal article supplement (doi:10.3390/cancers15205104), 2023-10-23
Supplement: s1 [file s1]

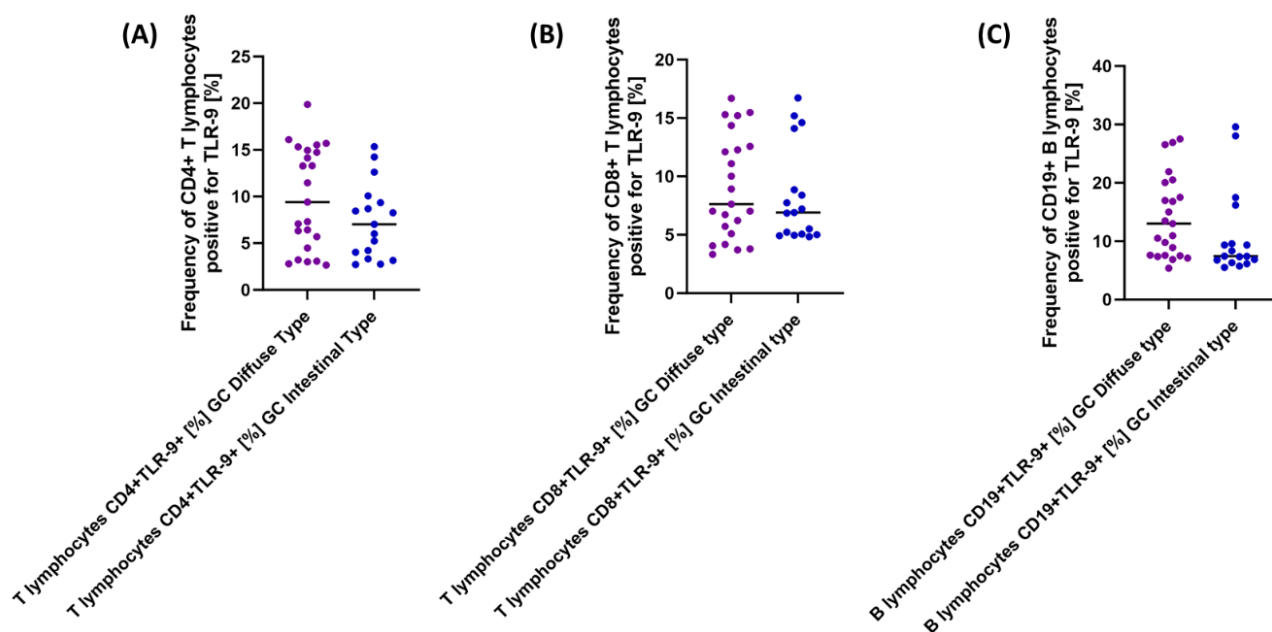

**Supplementary Materials Figure 1.** Analysis of the percentage of TLR-9 on selected subpopulations of T (A, B) and B (C) lymphocytes in GC patients according to Lauren classification. Patients with diffuse type were marked in purple color and intestinal type in blue.

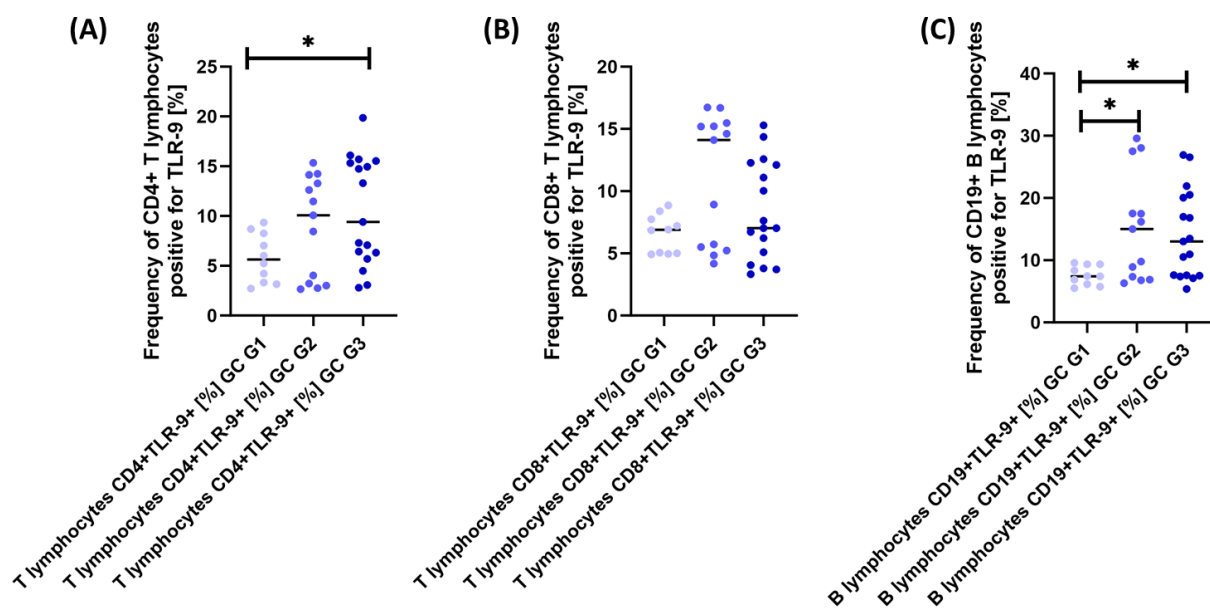

**Supplementary Materials Figure 2.** Analysis of the percentage of TLR-9 on selected subpopulations of T cells (A, B) and B (C) in GC patients by grade. For easier interpretation of the results, individual grades are marked with colors. Statistically significant results are marked \*.

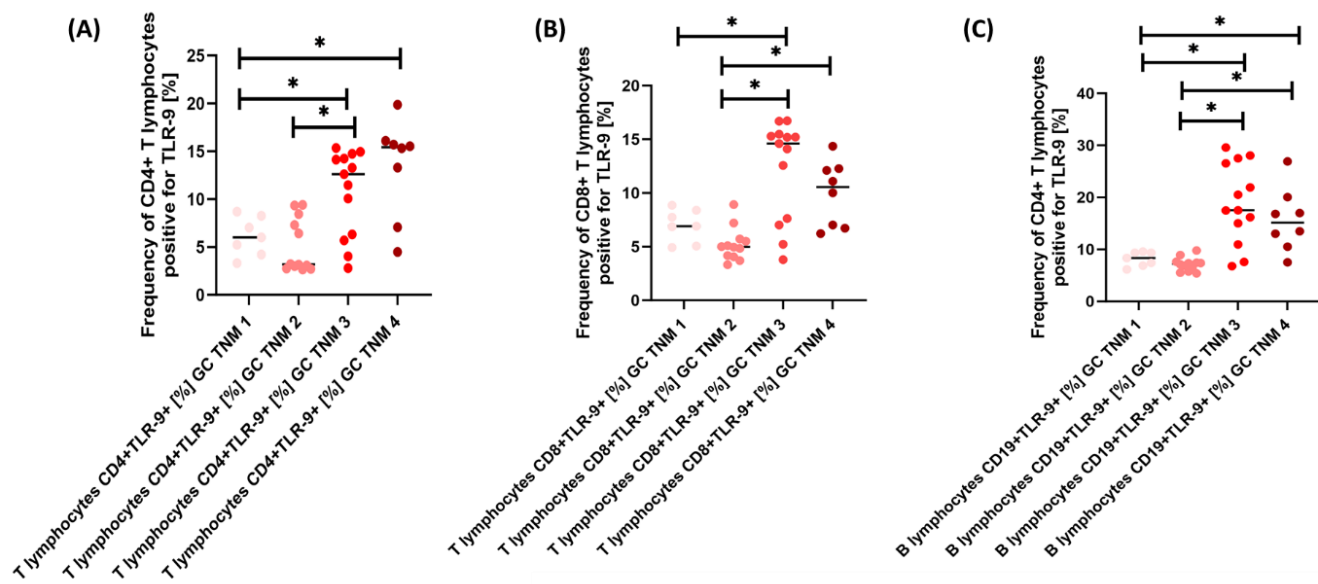

**Supplementary Materials Figure 3.** Analysis of the percentage of TLR-9 on selected subpopulations of T (A, B) and B (C) lymphocytes in GC patients by TNM stage. For easier interpretation of the results, individual grades are marked with colors. Statistically significant results are marked \*.

Supplementary Materials Table S1: Details of TLR-9 serum concentration [ng/mL].

| Parameters                   |                 | TLR-9 serum concentration [ng/mL] |                     |                                                                                                                                             |
|------------------------------|-----------------|-----------------------------------|---------------------|---------------------------------------------------------------------------------------------------------------------------------------------|
| <b>Total</b>                 | GC patients     | Mean±SD                           | 15.95± 7.83         | 0.000*                                                                                                                                      |
|                              |                 | Median (range)                    | 14.09 (4.99-31.70)  |                                                                                                                                             |
|                              | HV              | Mean±SD                           | 3.05± 0.57          |                                                                                                                                             |
|                              |                 | Median (range)                    | 3.16 (2.03-3.92)    |                                                                                                                                             |
| <b>Lauren classification</b> | Diffuse type    | Mean±SD                           | 18.10± 7.44         | 0.036*                                                                                                                                      |
|                              |                 | Median (range)                    | 18.09 (5.74-31.70)  |                                                                                                                                             |
|                              | Intestinal type | Mean±SD                           | 13.04± 7.26         |                                                                                                                                             |
|                              |                 | Median (range)                    | 11.46 (4.99-28.83)  |                                                                                                                                             |
| <b>Grade</b>                 | G1              | Mean±SD                           | 8.70± 3.76          | p- value: 0,0001*<br>G1 vs. G2 0.001*<br>G1 vs. G3 0.001*<br>G2 vs .G3 0.869                                                                |
|                              |                 | Median (range)                    | 8.06 (4.99-17.30)   |                                                                                                                                             |
|                              | G2              | Mean±SD                           | 18.45± 6.98         |                                                                                                                                             |
|                              |                 | Median (range)                    | 19.87 (7.65-28.83)  |                                                                                                                                             |
|                              | G3              | Mean±SD                           | 18.30± 7.59         |                                                                                                                                             |
|                              |                 | Median (range)                    | 18.09 (5.74-31.70)  |                                                                                                                                             |
| <b>TNM stage</b>             | TNM I           | Mean±SD                           | 7.78± 2.73          | p- value: 0,000*<br>I vs II: 0.142<br>I vs. III: 0.000*<br>I vs. IV: 0.003*<br>II vs. III: 0.000*<br>II vs. IV: 0.000*<br>III vs. IV: 0.645 |
|                              |                 | Median (range)                    | 6.65 (4.99-11.80)   |                                                                                                                                             |
|                              | TNM II          | Mean±SD                           | 10.02± 3.22         |                                                                                                                                             |
|                              |                 | Median (range)                    | 9.45 (5.71-17.30)   |                                                                                                                                             |
|                              | TNM III         | Mean±SD                           | 22.47± 6.30         |                                                                                                                                             |
|                              |                 | Median (range)                    | 22.97 (11.72-31.70) |                                                                                                                                             |
|                              | TNM IV          | Mean±SD                           | 21.38± 3.25         |                                                                                                                                             |
|                              |                 | Median (range)                    | 23.22 (15.51-24.94) |                                                                                                                                             |

Supplementary Materials Table S2: Spearman's *rank* correlation analysis in Alive GC patients.

| Parameters                                                                                | R      | t(N-2) | p      |
|-------------------------------------------------------------------------------------------|--------|--------|--------|
| T lymphocytes CD3+CD8+ [%] & T lymphocytes ratio CD3+CD4+/T CD3+CD8+                      | -0.929 | -8.298 | 0.000* |
| NKT-like cells CD3+CD16+CD56+ [%] & T lymphocytes ratio CD3+CD4+/T CD3+CD8+               | -0.896 | -6.677 | 0.000* |
| White blood cells [10 <sup>3</sup> /mm <sup>3</sup> ] & NKT-like cells CD3+CD16+CD56+ [%] | -0.786 | -4.213 | 0.001* |

|                                                                                    |        |        |         |
|------------------------------------------------------------------------------------|--------|--------|---------|
| NK cells CD3-CD16+CD56+ [%] & T lymphocytes ratio CD3+CD4+/T CD3+CD8+              | -0.769 | -3.993 | 0.002*  |
| T lymphocytes CD3+CD4+ [%] & T lymphocytes CD3+CD8+ [%]                            | -0.764 | -3.924 | 0.002*  |
| NK cells CD3-CD16+CD56+ [%] & T lymphocytes CD3+CD4+ [%]                           | -0.692 | -3.182 | 0.009*  |
| White blood cells [ $10^3/\text{mm}^3$ ] & NK cells CD3-CD16+CD56+ [%]             | -0.659 | -2.909 | 0.014** |
| NKT-like cells CD3+CD16+CD56+ [%] & T lymphocytes CD3+CD4+ [%]                     | -0.659 | -2.909 | 0.014*  |
| NK cells CD3-CD16+CD56+ [%] & Survival time from diagnosis [months]                | -0.566 | -2.277 | 0.044*  |
| White blood cells [ $10^3/\text{mm}^3$ ] & T lymphocytes ratio CD3+CD4+/T CD3+CD8+ | 0.604  | 2.516  | 0.029*  |
| White blood cells [ $10^3/\text{mm}^3$ ] & Survival time from diagnosis [months]   | 0.632  | 2.704  | 0.021*  |
| NK cells CD3-CD16+CD56+ [%] & T lymphocytes CD3+CD8+ [%]                           | 0.786  | 4.213  | 0.001*  |
| NK cells CD3-CD16+CD56+ [%] & NKT-like cells CD3+CD16+CD56+ [%]                    | 0.846  | 5.266  | 0.000*  |
| T lymphocytes CD3+CD4+ [%] & T lymphocytes ratio CD3+CD4+/T CD3+CD8+               | 0.896  | 6.677  | 0.000*  |
| NKT-like cells CD3+CD16+CD56+ [%] & T lymphocytes CD3+CD8+ [%]                     | 0.901  | 6.892  | 0.000*  |

Supplementary Materials Table S3: Sperman's rank correlation analysis in Dead GC patients.

| Parameters                                                                    | R      | t(N-2)  | p      |
|-------------------------------------------------------------------------------|--------|---------|--------|
| White blood cells [ $10^3/\text{mm}^3$ ] & NK cells CD3-CD16+CD56+ [%]        | -0.996 | -58.256 | 0.000* |
| White blood cells [ $10^3/\text{mm}^3$ ] & NKT-like cells CD3+CD16+CD56+ [%]  | -0.994 | -46.845 | 0.000* |
| Lymphocytes [ $10^3/\text{mm}^3$ ] & NK cells CD3-CD16+CD56+ [%]              | -0.946 | -14.608 | 0.000* |
| T lymphocytes CD3+CD8+ [%] & T lymphocytes ratio CD3+CD4+/T CD3+CD8+          | -0.937 | -13.425 | 0.000* |
| Lymphocytes [ $10^3/\text{mm}^3$ ] & NKT-like cells CD3+CD16+CD56+ [%]        | -0.931 | -12.705 | 0.000* |
| White blood cells [ $10^3/\text{mm}^3$ ] & T lymphocytes CD3+CD8+ [%]         | -0.896 | -10.066 | 0.000* |
| NK cells CD3-CD16+CD56+ [%] & T lymphocytes ratio CD3+CD4+/T CD3+CD8+         | -0.869 | -8.796  | 0.000* |
| Lymphocytes [ $10^3/\text{mm}^3$ ] & T lymphocytes CD3+CD8+ [%]               | -0.866 | -8.664  | 0.000* |
| Survival time from diagnosis [months] & DNA EBV copy number [copies/1 ug DNA] | -0.861 | -8.451  | 0.000* |
| NKT-like cells CD3+CD16+CD56+ [%] & T lymphocytes ratio CD3+CD4+/T CD3+CD8+   | -0.835 | -7.596  | 0.000* |
| Monocytes [ $10^3/\text{mm}^3$ ] & NKT-like cells CD3+CD16+CD56+ [%]          | -0.828 | -7.396  | 0.000* |
| Monocytes [ $10^3/\text{mm}^3$ ] & NK cells CD3-CD16+CD56+ [%]                | -0.823 | -7.252  | 0.000* |
| Survival time from diagnosis [months] & TLR-9 serum concentration [ng/mL]     | -0.791 | -6.459  | 0.000* |
| Survival time from diagnosis [months] & T lymphocytes CD4+TLR-9+ [%]          | -0.764 | -5.929  | 0.000* |
| Survival time from diagnosis [months] & T lymphocytes CD8+TLR-9+ [%]          | -0.764 | -5.923  | 0.000* |
| Survival time from diagnosis [months] & B lymphocytes CD19+TLR-9+ [%]         | -0.733 | -5.391  | 0.000* |
| Monocytes [ $10^3/\text{mm}^3$ ] & T lymphocytes CD3+CD8+ [%]                 | -0.708 | -5.010  | 0.000* |
| Stage (TNM) [I-IV] & Survival time from diagnosis [months]                    | -0.484 | -2.767  | 0.010* |

|                                                                                    |        |        |        |
|------------------------------------------------------------------------------------|--------|--------|--------|
| NKT-like cells CD3+CD16+CD56+ [%] & T lymphocytes CD3+CD4+ [%]                     | -0.447 | -2.498 | 0.019* |
| Survival time from diagnosis [months] & T lymphocytes CD3+ [%]                     | -0.433 | -2.405 | 0.024* |
| NK cells CD3-CD16+CD56+ [%] & T lymphocytes CD3+CD4+ [%]                           | -0.420 | -2.314 | 0.029* |
| Monocytes [ $10^3/\text{mm}^3$ ] & T lymphocytes CD3+ [%]                          | 0.392  | 2.129  | 0.043* |
| T lymphocytes CD4+TLR-9+ [%] & T lymphocytes CD3+ [%]                              | 0.402  | 2.194  | 0.038* |
| B lymphocytes CD19+TLR-9+ [%] & Stage (TNM) [I-IV]                                 | 0.407  | 2.225  | 0.035* |
| T lymphocytes CD3+CD4+ [%] & White blood cells [ $10^3/\text{mm}^3$ ]              | 0.424  | 2.343  | 0.027* |
| DNA EBV copy number [copies/1 ug DNA] & Stage (TNM) [I-IV]                         | 0.454  | 2.549  | 0.017* |
| TLR-9 serum concentration [ng/mL] & Stage (TNM) [I-IV]                             | 0.476  | 2.707  | 0.012* |
| T lymphocytes CD4+TLR-9+ [%] & Stage (TNM) [I-IV]                                  | 0.576  | 3.519  | 0.002* |
| B lymphocytes CD19+TLR-9+ [%] & T lymphocytes CD4+TLR-9+ [%]                       | 0.602  | 3.769  | 0.001* |
| T lymphocytes ratio CD3+CD4+/T CD3+CD8+ & T lymphocytes CD3+CD4+ [%]               | 0.603  | 3.775  | 0.001* |
| T lymphocytes CD4+TLR-9+ [%] & T lymphocytes CD8+TLR-9+ [%]                        | 0.667  | 4.472  | 0.000* |
| T lymphocytes CD4+TLR-9+ [%] & TLR-9 serum concentration [ng/mL]                   | 0.712  | 5.068  | 0.000* |
| DNA EBV copy number [copies/1 ug DNA] & T lymphocytes CD4+TLR-9+ [%]               | 0.762  | 5.883  | 0.000* |
| Monocytes [ $10^3/\text{mm}^3$ ] & Lymphocytes [ $10^3/\text{mm}^3$ ]              | 0.779  | 6.208  | 0.000* |
| White blood cells [ $10^3/\text{mm}^3$ ] & Monocytes [ $10^3/\text{mm}^3$ ]        | 0.809  | 6.872  | 0.000* |
| Lymphocytes [ $10^3/\text{mm}^3$ ] & T lymphocytes ratio CD3+CD4+/T CD3+CD8+       | 0.813  | 6.974  | 0.000* |
| T lymphocytes CD8+TLR-9+ [%] & B lymphocytes CD19+TLR-9+ [%]                       | 0.825  | 7.310  | 0.000* |
| B lymphocytes CD19+TLR-9+ [%] & TLR-9 serum concentration [ng/mL]                  | 0.827  | 7.344  | 0.000* |
| White blood cells [ $10^3/\text{mm}^3$ ] & T lymphocytes ratio CD3+CD4+/T CD3+CD8+ | 0.856  | 8.276  | 0.000* |
| NKT-like cells CD3+CD16+CD56+ [%] & T lymphocytes CD3+CD8+ [%]                     | 0.870  | 8.814  | 0.000* |
| T lymphocytes CD8+TLR-9+ [%] & TLR-9 serum concentration [ng/mL]                   | 0.880  | 9.280  | 0.000* |
| DNA EBV copy number [copies/1 ug DNA] & B lymphocytes CD19+TLR-9+ [%]              | 0.890  | 9.759  | 0.000* |
| DNA EBV copy number [copies/1 ug DNA] & T lymphocytes CD8+TLR-9+ [%]               | 0.899  | 10.243 | 0.000* |
| NK cells CD3-CD16+CD56+ [%] & T lymphocytes CD3+CD8+ [%]                           | 0.911  | 11.035 | 0.000* |
| DNA EBV copy number [copies/1 ug DNA] & TLR-9 serum concentration [ng/mL]          | 0.941  | 13.866 | 0.000* |
| White blood cells [ $10^3/\text{mm}^3$ ] & Lymphocytes [ $10^3/\text{mm}^3$ ]      | 0.952  | 15.483 | 0.000* |
| NK cells CD3-CD16+CD56+ [%] & NKT-like cells CD3+CD16+CD56+ [%]                    | 0.991  | 36.383 | 0.000* |

Supplementary Materials Table S4: Sperman's rank correlation analysis in GC Diffuse type patients.

| Parameters                                                             | R      | t(N-2)  | p      |
|------------------------------------------------------------------------|--------|---------|--------|
| White blood cells [ $10^3/\text{mm}^3$ ] & NK cells CD3-CD16+CD56+ [%] | -0.996 | -51.388 | 0.000* |
| T lymphocytes CD3+CD8+ [%] & White blood cells [ $10^3/\text{mm}^3$ ]  | -0.960 | -15.812 | 0.000* |

|                                                                               |        |         |        |
|-------------------------------------------------------------------------------|--------|---------|--------|
| Lymphocytes [ $10^3/\text{mm}^3$ ] & NK cells CD3-CD16+CD56+ [%]              | -0.957 | -15.165 | 0.000* |
| NK cells CD3-CD16+CD56+ [%] & Lymphocytes [ $10^3/\text{mm}^3$ ]              | -0.957 | -15.165 | 0.000* |
| NKT-like cells CD3+CD16+CD56+ [%] & Lymphocytes [ $10^3/\text{mm}^3$ ]        | -0.947 | -13.490 | 0.000* |
| NKT-like cells CD3+CD16+CD56+ [%] & T lymphocytes ratio CD3+CD4+/T CD3+CD8+   | -0.870 | -8.078  | 0.000* |
| Survival time from diagnosis [months] & DNA EBV copy number [copies/1 ug DNA] | -0.869 | -8.045  | 0.000* |
| DNA EBV copy number [copies/1 ug DNA] & Survival time from diagnosis [months] | -0.869 | -8.045  | 0.000* |
| NK cells CD3-CD16+CD56+ [%] & T lymphocytes ratio CD3+CD4+/T CD3+CD8+         | -0.869 | -8.032  | 0.000* |
| T lymphocytes ratio CD3+CD4+/T CD3+CD8+ & NK cells CD3-CD16+CD56+ [%]         | -0.869 | -8.032  | 0.000* |
| Monocytes [ $10^3/\text{mm}^3$ ] & NKT-like cells CD3+CD16+CD56+ [%]          | -0.827 | -6.750  | 0.000* |
| Survival time from diagnosis [months] & TLR-9 serum concentration [ng/mL]     | -0.800 | -6.114  | 0.000* |
| T lymphocytes CD3+CD8+ [%] & Monocytes [ $10^3/\text{mm}^3$ ]                 | -0.774 | -5.601  | 0.000* |
| Survival time from diagnosis [months] & T lymphocytes CD8+TLR-9+ [%]          | -0.724 | -4.809  | 0.000* |
| T lymphocytes CD8+TLR-9+ [%] & Survival time from diagnosis [months]          | -0.724 | -4.809  | 0.000* |
| Stage (TNM) [I-IV] & Survival time from diagnosis [months]                    | -0.645 | -3.871  | 0.001* |
| T lymphocytes CD3+CD4+ [%] & T lymphocytes CD3+CD8+ [%]                       | -0.502 | -2.660  | 0.015* |
| T lymphocytes CD3+CD8+ [%] & T lymphocytes CD3+CD4+ [%]                       | -0.502 | -2.660  | 0.015* |
| NKT-like cells CD3+CD16+CD56+ [%] & T lymphocytes CD3+CD4+ [%]                | -0.479 | -2.500  | 0.021* |
| NK cells CD3-CD16+CD56+ [%] & T lymphocytes CD3+CD4+ [%]                      | -0.477 | -2.489  | 0.021* |
| T lymphocytes CD3+CD4+ [%] & NK cells CD3-CD16+CD56+ [%]                      | -0.477 | -2.489  | 0.021* |
| Stage (TNM) [I-IV] & Lymphocytes [ $10^3/\text{mm}^3$ ]                       | 0.414  | 2.084   | 0.050* |
| Lymphocytes [ $10^3/\text{mm}^3$ ] & Stage (TNM) [I-IV]                       | 0.414  | 2.084   | 0.050* |
| T lymphocytes CD3+ [%] & T lymphocytes CD8+TLR-9+ [%]                         | 0.420  | 2.121   | 0.046* |
| T lymphocytes CD8+TLR-9+ [%] & T lymphocytes CD3+ [%]                         | 0.420  | 2.121   | 0.046* |
| Lymphocytes [ $10^3/\text{mm}^3$ ] & T lymphocytes CD3+CD4+ [%]               | 0.424  | 2.146   | 0.044* |
| White blood cells [ $10^3/\text{mm}^3$ ] & T lymphocytes CD3+CD4+ [%]         | 0.458  | 2.364   | 0.028* |
| T lymphocytes CD4+TLR-9+ [%] & Lymphocytes [ $10^3/\text{mm}^3$ ]             | 0.466  | 2.410   | 0.025* |
| Stage (TNM) [I-IV] & T lymphocytes CD8+TLR-9+ [%]                             | 0.470  | 2.443   | 0.023* |
| Monocytes [ $10^3/\text{mm}^3$ ] & T lymphocytes CD3+ [%]                     | 0.473  | 2.459   | 0.023* |
| T lymphocytes CD3+ [%] & Monocytes [ $10^3/\text{mm}^3$ ]                     | 0.473  | 2.459   | 0.023* |
| B lymphocytes CD19+TLR-9+ [%] & Stage (TNM) [I-IV]                            | 0.519  | 2.780   | 0.011* |

|                                                                                                       |       |        |        |
|-------------------------------------------------------------------------------------------------------|-------|--------|--------|
| Stage (TNM) [I-IV] & TLR-9 serum concentration [ng/mL]                                                | 0.617 | 3.594  | 0.002* |
| TLR-9 serum concentration [ng/mL] & Stage (TNM) [I-IV]                                                | 0.617 | 3.594  | 0.002* |
| T lymphocytes CD4+TLR-9+ [%] & Stage (TNM) [I-IV]                                                     | 0.642 | 3.835  | 0.001* |
| Monocytes [10 <sup>3</sup> /mm <sup>3</sup> ] & T lymphocytes ratio CD3+CD4+/T CD3+CD8+               | 0.648 | 3.903  | 0.001* |
| T lymphocytes ratio CD3+CD4+/T CD3+CD8+ & Monocytes [10 <sup>3</sup> /mm <sup>3</sup> ]               | 0.648 | 3.903  | 0.001* |
| T lymphocytes CD4+TLR-9+ [%] & TLR-9 serum concentration [ng/mL]                                      | 0.693 | 4.401  | 0.000* |
| T lymphocytes CD4+TLR-9+ [%] & T lymphocytes CD8+TLR-9+ [%]                                           | 0.694 | 4.413  | 0.000* |
| White blood cells [10 <sup>3</sup> /mm <sup>3</sup> ] & Monocytes [10 <sup>3</sup> /mm <sup>3</sup> ] | 0.792 | 5.951  | 0.000* |
| T lymphocytes ratio CD3+CD4+/T CD3+CD8+ & T lymphocytes CD3+CD4+ [%]                                  | 0.796 | 6.036  | 0.000* |
| Lymphocytes [10 <sup>3</sup> /mm <sup>3</sup> ] & T lymphocytes ratio CD3+CD4+/T CD3+CD8+             | 0.817 | 6.502  | 0.000* |
| T lymphocytes CD4+TLR-9+ [%] & DNA EBV copy number [copies/1 ug DNA]                                  | 0.824 | 6.667  | 0.000* |
| T lymphocytes CD8+TLR-9+ [%] & B lymphocytes CD19+TLR-9+ [%]                                          | 0.845 | 7.237  | 0.000* |
| B lymphocytes CD19+TLR-9+ [%] & T lymphocytes CD8+TLR-9+ [%]                                          | 0.845 | 7.237  | 0.000* |
| TLR-9 serum concentration [ng/mL] & T lymphocytes CD8+TLR-9+ [%]                                      | 0.845 | 7.237  | 0.000* |
| White blood cells [10 <sup>3</sup> /mm <sup>3</sup> ] & T lymphocytes ratio CD3+CD4+/T CD3+CD8+       | 0.863 | 7.816  | 0.000* |
| T lymphocytes ratio CD3+CD4+/T CD3+CD8+ & White blood cells [10 <sup>3</sup> /mm <sup>3</sup> ]       | 0.863 | 7.816  | 0.000* |
| B lymphocytes CD19+TLR-9+ [%] & DNA EBV copy number [copies/1 ug DNA]                                 | 0.879 | 8.452  | 0.000* |
| DNA EBV copy number [copies/1 ug DNA] & T lymphocytes CD8+TLR-9+ [%]                                  | 0.886 | 8.741  | 0.000* |
| DNA EBV copy number [copies/1 ug DNA] & TLR-9 serum concentration [ng/mL]                             | 0.958 | 15.277 | 0.000* |
| TLR-9 serum concentration [ng/mL] & DNA EBV copy number [copies/1 ug DNA]                             | 0.958 | 15.277 | 0.000* |
| T lymphocytes CD3+CD8+ [%] & NK cells CD3-CD16+CD56+ [%]                                              | 0.962 | 16.248 | 0.000* |

Supplementary Materials Table S5: Sperman's rank correlation analysis in patients with GC Intestinal type.

| Parameters                                                                                | R      | t(N-2) | p      |
|-------------------------------------------------------------------------------------------|--------|--------|--------|
| White blood cells [10 <sup>3</sup> /mm <sup>3</sup> ] & NKT-like cells CD3+CD16+CD56+ [%] | -0.929 | -9.716 | 0.000* |
| White blood cells [10 <sup>3</sup> /mm <sup>3</sup> ] & NK cells CD3-CD16+CD56+ [%]       | -0.892 | -7.649 | 0.000* |
| Survival time from diagnosis [months] & TLR-9 serum concentration [ng/mL]                 | -0.846 | -6.135 | 0.000* |
| T lymphocytes CD3+CD8+ [%] & T lymphocytes ratio CD3+CD4+/T CD3+CD8+                      | -0.824 | -5.623 | 0.000* |



|                                                                                                 |        |        |        |
|-------------------------------------------------------------------------------------------------|--------|--------|--------|
| Survival time from diagnosis [months] & DNA EBV copy number [copies/1 ug DNA]                   | -0.741 | -4.273 | 0.001* |
| Stage (TNM) [I-IV] & Survival time from diagnosis [months]                                      | -0.723 | -4.050 | 0.001* |
| NK cells CD3-CD16+CD56+ [%] & T lymphocytes CD8+TLR-9+ [%]                                      | -0.716 | -3.969 | 0.001* |
| NKT-like cells CD3+CD16+CD56+ [%] & T lymphocytes ratio CD3+CD4+/T CD3+CD8+                     | -0.679 | -3.581 | 0.003* |
| Survival time from diagnosis [months] & T lymphocytes CD4+TLR-9+ [%]                            | -0.647 | -3.287 | 0.005* |
| NK cells CD3-CD16+CD56+ [%] & T lymphocytes ratio CD3+CD4+/T CD3+CD8+                           | -0.645 | -3.266 | 0.005* |
| NKT-like cells CD3+CD16+CD56+ [%] & T lymphocytes CD8+TLR-9+ [%]                                | -0.640 | -3.223 | 0.006* |
| NKT-like cells CD3+CD16+CD56+ [%] & T lymphocytes CD3+CD4+ [%]                                  | -0.623 | -3.081 | 0.008* |
| NK cells CD3-CD16+CD56+ [%] & T lymphocytes CD3+CD4+ [%]                                        | -0.618 | -3.042 | 0.008* |
| DNA EBV copy number [copies/1 ug DNA] & NK cells CD3-CD16+CD56+ [%]                             | -0.553 | -2.572 | 0.021* |
| NK cells CD3-CD16+CD56+ [%] & DNA EBV copy number [copies/1 ug DNA]                             | -0.553 | -2.572 | 0.021* |
| Survival time from diagnosis [months] & B lymphocytes CD19+TLR-9+ [%]                           | -0.551 | -2.560 | 0.022* |
| NK cells CD3-CD16+CD56+ [%] & T lymphocytes CD4+TLR-9+ [%]                                      | -0.527 | -2.401 | 0.030* |
| NK cells CD3-CD16+CD56+ [%] & B lymphocytes CD19+TLR-9+ [%]                                     | -0.525 | -2.386 | 0.031* |
| NK cells CD3-CD16+CD56+ [%] & T lymphocytes CD3+CD8+ [%]                                        | 0.490  | 2.178  | 0.046* |
| White blood cells [10 <sup>3</sup> /mm <sup>3</sup> ] & T lymphocytes CD8+TLR-9+ [%]            | 0.515  | 2.325  | 0.035* |
| Monocytes [10 <sup>3</sup> /mm <sup>3</sup> ] & Lymphocytes [10 <sup>3</sup> /mm <sup>3</sup> ] | 0.528  | 2.410  | 0.029* |
| White blood cells [10 <sup>3</sup> /mm <sup>3</sup> ] & T lymphocytes ratio CD3+CD4+/T CD3+CD8+ | 0.529  | 2.417  | 0.029* |
| B lymphocytes CD19+ [%] & T lymphocytes ratio CD3+CD4+/T CD3+CD8+                               | 0.537  | 2.464  | 0.026* |
| T lymphocytes CD3+CD8+ [%] & NKT-like cells CD3+CD16+CD56+ [%]                                  | 0.537  | 2.464  | 0.026* |
| White blood cells [10 <sup>3</sup> /mm <sup>3</sup> ] & T lymphocytes CD3+CD4+ [%]              | 0.539  | 2.480  | 0.026* |
| DNA EBV copy number [copies/1 ug DNA] & White blood cells [10 <sup>3</sup> /mm <sup>3</sup> ]   | 0.553  | 2.572  | 0.021* |
| Stage (TNM) [I-IV] & T lymphocytes CD3+CD4+ [%]                                                 | 0.587  | 2.809  | 0.013* |
| T lymphocytes CD3+ [%] & T lymphocytes CD3+CD8+ [%]                                             | 0.630  | 3.141  | 0.007* |
| Stage (TNM) [I-IV] & DNA EBV copy number [copies/1 ug DNA]                                      | 0.715  | 3.963  | 0.001* |
| DNA EBV copy number [copies/1 ug DNA] & T lymphocytes CD4+TLR-9+ [%]                            | 0.721  | 4.032  | 0.001* |
| T lymphocytes CD4+TLR-9+ [%] & B lymphocytes CD19+TLR-9+ [%]                                    | 0.730  | 4.142  | 0.001* |
| T lymphocytes CD8+TLR-9+ [%] & B lymphocytes CD19+TLR-9+ [%]                                    | 0.735  | 4.202  | 0.001* |



|                                                                           |       |        |        |
|---------------------------------------------------------------------------|-------|--------|--------|
| DNA EBV copy number [copies/1 ug DNA] & T lymphocytes CD8+TLR-9+ [%]      | 0.741 | 4.273  | 0.001* |
| DNA EBV copy number [copies/1 ug DNA] & TLR-9 serum concentration [ng/mL] | 0.741 | 4.273  | 0.001* |
| B lymphocytes CD19+TLR-9+ [%] & DNA EBV copy number [copies/1 ug DNA]     | 0.741 | 4.273  | 0.001* |
| T lymphocytes CD3+CD4+ [%] & T lymphocytes ratio CD3+CD4+/T CD3+CD8+      | 0.762 | 4.561  | 0.000* |
| Stage (TNM) [I-IV] & TLR-9 serum concentration [ng/mL]                    | 0.788 | 4.957  | 0.000* |
| T lymphocytes CD4+TLR-9+ [%] & T lymphocytes CD8+TLR-9+ [%]               | 0.858 | 6.465  | 0.000* |
| NK cells CD3-CD16+CD56+ [%] & NKT-like cells CD3+CD16+CD56+ [%]           | 0.963 | 13.886 | 0.000* |

Supplementary Materials Table S6: Sperman's rank correlation analysis in GC-G1 patients.

| Parameters                                                                                | R      | t(N-2)  | p      |
|-------------------------------------------------------------------------------------------|--------|---------|--------|
| T lymphocytes ratio CD3+CD4+/T CD3+CD8+ & T lymphocytes CD3+CD8+ [%]                      | -0.964 | -10.200 | 0.000* |
| T lymphocytes ratio CD3+CD4+/T CD3+CD8+ & NKT-like cells CD3+CD16+CD56+ [%]               | -0.879 | -5.209  | 0.001* |
| NKT-like cells CD3+CD16+CD56+ [%] & Survival time from diagnosis [months]                 | -0.830 | -4.214  | 0.003* |
| T lymphocytes ratio CD3+CD4+/T CD3+CD8+ & NK cells CD3-CD16+CD56+ [%]                     | -0.806 | -3.852  | 0.005* |
| T lymphocytes CD3+CD8+ [%] & T lymphocytes CD3+CD4+ [%]                                   | -0.794 | -3.693  | 0.006* |
| White blood cells [10 <sup>3</sup> /mm <sup>3</sup> ] & NKT-like cells CD3+CD16+CD56+ [%] | -0.733 | -3.051  | 0.016* |
| NK cells CD3-CD16+CD56+ [%] & T lymphocytes CD3+CD4+ [%]                                  | -0.673 | -2.572  | 0.033* |
| B lymphocytes CD19+TLR-9+ [%] & Lymphocytes [10 <sup>3</sup> /mm <sup>3</sup> ]           | -0.661 | -2.489  | 0.038* |
| NK cells CD3-CD16+CD56+ [%] & T lymphocytes CD8+TLR-9+ [%]                                | -0.648 | -2.410  | 0.043* |
| T lymphocytes CD3+CD8+ [%] & Monocytes [10 <sup>3</sup> /mm <sup>3</sup> ]                | 0.638  | 2.345   | 0.047* |
| Survival time from diagnosis [months] & T lymphocytes ratio CD3+CD4+/T CD3+CD8+           | 0.697  | 2.749   | 0.025* |
| NK cells CD3-CD16+CD56+ [%] & T lymphocytes CD3+CD8+ [%]                                  | 0.745  | 3.163   | 0.013* |

|                                                                                               |       |       |        |
|-----------------------------------------------------------------------------------------------|-------|-------|--------|
| NK cells CD3-CD16+CD56+ [%] & NKT-like cells CD3+CD16+CD56+ [%]                               | 0.879 | 5.209 | 0.001* |
| NKT-like cells CD3+CD16+CD56+ [%] & T lymphocytes CD3+CD8+ [%]                                | 0.879 | 5.209 | 0.001* |
| T lymphocytes CD3+CD8+ [%] & NKT-like cells CD3+CD16+CD56+ [%]                                | 0.879 | 5.209 | 0.001* |
| Survival time from diagnosis [months] & White blood cells [10 <sup>3</sup> /mm <sup>3</sup> ] | 0.891 | 5.548 | 0.001* |

Supplementary Materials Table S7: Sperman's rank correlation analysis in GC-G2 patients.

| Parameters                                                                                | R      | t(N-2)  | p      |
|-------------------------------------------------------------------------------------------|--------|---------|--------|
| White blood cells [10 <sup>3</sup> /mm <sup>3</sup> ] & NKT-like cells CD3+CD16+CD56+ [%] | -0.995 | -31.508 | 0.000* |
| White blood cells [10 <sup>3</sup> /mm <sup>3</sup> ] & NK cells CD3-CD16+CD56+ [%]       | -0.989 | -22.187 | 0.000* |
| Survival time from diagnosis [months] & TLR-9 serum concentration [ng/mL]                 | -0.941 | -9.210  | 0.000* |
| T lymphocytes CD3+CD8+ [%] & T lymphocytes ratio CD3+CD4+/T CD3+CD8+                      | -0.912 | -7.378  | 0.000* |
| Survival time from diagnosis [months] & DNA EBV copy number [copies/1 ug DNA]             | -0.897 | -6.732  | 0.000* |
| Survival time from diagnosis [months] & T lymphocytes CD4+TLR-9+ [%]                      | -0.856 | -5.481  | 0.000* |
| Stage (TNM) [I-IV] & Survival time from diagnosis [months]                                | -0.762 | -3.899  | 0.002* |
| Survival time from diagnosis [months] & T lymphocytes CD8+TLR-9+ [%]                      | -0.754 | -3.804  | 0.003* |
| Survival time from diagnosis [months] & B lymphocytes CD19+TLR-9+ [%]                     | -0.740 | -3.649  | 0.004* |
| Lymphocytes [10 <sup>3</sup> /mm <sup>3</sup> ] & NK cells CD3-CD16+CD56+ [%]             | -0.698 | -3.231  | 0.008* |
| Lymphocytes [10 <sup>3</sup> /mm <sup>3</sup> ] & NKT-like cells CD3+CD16+CD56+ [%]       | -0.692 | -3.182  | 0.009* |
| NK cells CD3-CD16+CD56+ [%] & T lymphocytes ratio CD3+CD4+/T CD3+CD8+                     | -0.637 | -2.743  | 0.019* |
| White blood cells [10 <sup>3</sup> /mm <sup>3</sup> ] & T lymphocytes CD3+CD8+ [%]        | -0.582 | -2.376  | 0.037* |
| T lymphocytes CD3+CD8+ [%] & White blood cells [10 <sup>3</sup> /mm <sup>3</sup> ]        | -0.582 | -2.376  | 0.037* |
| T lymphocytes CD3+CD4+ [%] & T lymphocytes CD4+TLR-9+ [%]                                 | -0.555 | -2.212  | 0.049* |
| T lymphocytes CD3+CD8+ [%] & NKT-like cells CD3+CD16+CD56+ [%]                            | 0.588  | 2.410   | 0.035* |

|                                                                                                         |       |        |        |
|---------------------------------------------------------------------------------------------------------|-------|--------|--------|
| T lymphocytes ratio CD3+CD4+/T CD3+CD8+ & White blood cells [10 <sup>3</sup> /mm <sup>3</sup> ]         | 0.599 | 2.480  | 0.031* |
| B lymphocytes CD19+TLR-9+ [%] & Monocytes [10 <sup>3</sup> /mm <sup>3</sup> ]                           | 0.605 | 2.522  | 0.028* |
| T lymphocytes CD3+CD8+ [%] & T lymphocytes CD3+ [%]                                                     | 0.626 | 2.665  | 0.022* |
| T lymphocytes CD3+CD8+ [%] & NK cells CD3-CD16+CD56+ [%]                                                | 0.637 | 2.743  | 0.019* |
| B lymphocytes CD19+TLR-9+ [%] & T lymphocytes CD4+TLR-9+ [%]                                            | 0.648 | 2.824  | 0.017* |
| B lymphocytes CD19+TLR-9+ [%] & Stage (TNM) [I-IV]                                                      | 0.676 | 3.044  | 0.011* |
| Stage (TNM) [I-IV] & TLR-9 serum concentration [ng/mL]                                                  | 0.718 | 3.425  | 0.006* |
| TLR-9 serum concentration [ng/mL] & Stage (TNM) [I-IV]                                                  | 0.718 | 3.425  | 0.006* |
| TLR-9 serum concentration [ng/mL] & B lymphocytes CD19+TLR-9+ [%]                                       | 0.731 | 3.551  | 0.005* |
| Lymphocytes [10 <sup>3</sup> /mm <sup>3</sup> ] & White blood cells [10 <sup>3</sup> /mm <sup>3</sup> ] | 0.747 | 3.729  | 0.003* |
| DNA EBV copy number [copies/1 ug DNA] & Stage (TNM) [I-IV]                                              | 0.778 | 4.105  | 0.002* |
| T lymphocytes CD8+TLR-9+ [%] & B lymphocytes CD19+TLR-9+ [%]                                            | 0.786 | 4.213  | 0.001* |
| T lymphocytes CD4+TLR-9+ [%] & TLR-9 serum concentration [ng/mL]                                        | 0.797 | 4.372  | 0.001* |
| DNA EBV copy number [copies/1 ug DNA] & T lymphocytes CD4+TLR-9+ [%]                                    | 0.800 | 4.429  | 0.001* |
| Stage (TNM) [I-IV] & T lymphocytes CD4+TLR-9+ [%]                                                       | 0.803 | 4.467  | 0.001* |
| T lymphocytes CD8+TLR-9+ [%] & TLR-9 serum concentration [ng/mL]                                        | 0.813 | 4.634  | 0.001* |
| DNA EBV copy number [copies/1 ug DNA] & T lymphocytes CD8+TLR-9+ [%]                                    | 0.824 | 4.815  | 0.001* |
| T lymphocytes CD4+TLR-9+ [%] & T lymphocytes CD8+TLR-9+ [%]                                             | 0.830 | 4.929  | 0.000* |
| DNA EBV copy number [copies/1 ug DNA] & B lymphocytes CD19+TLR-9+ [%]                                   | 0.899 | 6.796  | 0.000* |
| B lymphocytes CD19+TLR-9+ [%] & DNA EBV copy number [copies/1 ug DNA]                                   | 0.899 | 6.796  | 0.000* |
| NK cells CD3-CD16+CD56+ [%] & NKT-like cells CD3+CD16+CD56+ [%]                                         | 0.995 | 31.508 | 0.000* |

Supplementary Materials Table S8: Sperman's rank correlation analysis in GC-G3 patients.

| Parameters                                                                          | R      | t(N-2)  | p      |
|-------------------------------------------------------------------------------------|--------|---------|--------|
| White blood cells [10 <sup>3</sup> /mm <sup>3</sup> ] & NK cells CD3-CD16+CD56+ [%] | -0.998 | -55.216 | 0.000* |

|                                                                                           |        |         |        |
|-------------------------------------------------------------------------------------------|--------|---------|--------|
| White blood cells [10 <sup>3</sup> /mm <sup>3</sup> ] & NKT-like cells CD3+CD16+CD56+ [%] | -0.992 | -30.492 | 0.000* |
| Monocytes [10 <sup>3</sup> /mm <sup>3</sup> ] & NK cells CD3-CD16+CD56+ [%]               | -0.991 | -29.361 | 0.000* |
| Monocytes [10 <sup>3</sup> /mm <sup>3</sup> ] & NKT-like cells CD3+CD16+CD56+ [%]         | -0.988 | -24.488 | 0.000* |
| Lymphocytes [10 <sup>3</sup> /mm <sup>3</sup> ] & NK cells CD3-CD16+CD56+ [%]             | -0.985 | -21.865 | 0.000* |
| Lymphocytes [10 <sup>3</sup> /mm <sup>3</sup> ] & NKT-like cells CD3+CD16+CD56+ [%]       | -0.981 | -19.574 | 0.000* |
| White blood cells [10 <sup>3</sup> /mm <sup>3</sup> ] & T lymphocytes CD3+CD8+ [%]        | -0.941 | -10.787 | 0.000* |
| Monocytes [10 <sup>3</sup> /mm <sup>3</sup> ] & T lymphocytes CD3+CD8+ [%]                | -0.937 | -10.427 | 0.000* |
| Lymphocytes [10 <sup>3</sup> /mm <sup>3</sup> ] & T lymphocytes CD3+CD8+ [%]              | -0.931 | -9.856  | 0.000* |
| T lymphocytes CD3+CD8+ [%] & T lymphocytes ratio CD3+CD4+/T CD3+CD8+                      | -0.909 | -8.463  | 0.000* |
| Survival time from diagnosis [months] & T lymphocytes CD8+TLR-9+ [%]                      | -0.886 | -7.412  | 0.000* |
| Survival time from diagnosis [months] & DNA EBV copy number [copies/1 ug DNA]             | -0.874 | -6.956  | 0.000* |
| NKT-like cells CD3+CD16+CD56+ [%] & T lymphocytes ratio CD3+CD4+/T CD3+CD8+               | -0.866 | -6.699  | 0.000* |
| NK cells CD3-CD16+CD56+ [%] & T lymphocytes ratio CD3+CD4+/T CD3+CD8+                     | -0.858 | -6.465  | 0.000* |
| Survival time from diagnosis [months] & TLR-9 serum concentration [ng/mL]                 | -0.781 | -4.837  | 0.000* |
| Survival time from diagnosis [months] & B lymphocytes CD19+TLR-9+ [%]                     | -0.739 | -4.246  | 0.001* |
| Survival time from diagnosis [months] & T lymphocytes CD4+TLR-9+ [%]                      | -0.655 | -3.359  | 0.004* |
| T lymphocytes CD3+CD4+ [%] & T lymphocytes CD3+CD8+ [%]                                   | -0.581 | -2.764  | 0.014* |
| NKT-like cells CD3+CD16+CD56+ [%] & T lymphocytes CD3+CD4+ [%]                            | -0.554 | -2.579  | 0.021* |
| NK cells CD3-CD16+CD56+ [%] & T lymphocytes CD3+CD4+ [%]                                  | -0.534 | -2.448  | 0.027* |
| Stage (TNM) [I-IV] & Survival time from diagnosis [months]                                | -0.524 | -2.384  | 0.031* |
| Lymphocytes [10 <sup>3</sup> /mm <sup>3</sup> ] & T lymphocytes CD4+TLR-9+ [%]            | 0.495  | 2.209   | 0.043* |
| White blood cells [10 <sup>3</sup> /mm <sup>3</sup> ] & T lymphocytes CD3+CD4+ [%]        | 0.515  | 2.325   | 0.035* |
| T lymphocytes CD3+CD4+ [%] & White blood cells [10 <sup>3</sup> /mm <sup>3</sup> ]        | 0.515  | 2.325   | 0.035* |

|                                                                                    |       |        |        |
|------------------------------------------------------------------------------------|-------|--------|--------|
| Monocytes [ $10^3/\text{mm}^3$ ] & T lymphocytes CD3+CD4+ [%]                      | 0.520 | 2.359  | 0.032* |
| Stage (TNM) [I-IV] & T lymphocytes CD4+TLR-9+ [%]                                  | 0.526 | 2.394  | 0.030* |
| Stage (TNM) [I-IV] & T lymphocytes CD8+TLR-9+ [%]                                  | 0.560 | 2.619  | 0.019* |
| T lymphocytes CD4+TLR-9+ [%] & B lymphocytes CD19+TLR-9+ [%]                       | 0.596 | 2.872  | 0.012* |
| Stage (TNM) [I-IV] & TLR-9 serum concentration [ng/mL]                             | 0.601 | 2.914  | 0.011* |
| Stage (TNM) [I-IV] & DNA EBV copy number [copies/1 ug DNA]                         | 0.602 | 2.920  | 0.011* |
| T lymphocytes CD4+TLR-9+ [%] & TLR-9 serum concentration [ng/mL]                   | 0.637 | 3.203  | 0.006* |
| T lymphocytes CD4+TLR-9+ [%] & T lymphocytes CD8+TLR-9+ [%]                        | 0.762 | 4.561  | 0.000* |
| DNA EBV copy number [copies/1 ug DNA] & T lymphocytes CD4+TLR-9+ [%]               | 0.774 | 4.738  | 0.000* |
| T lymphocytes CD3+CD4+ [%] & T lymphocytes ratio CD3+CD4+/T CD3+CD8+               | 0.809 | 5.327  | 0.000* |
| B lymphocytes CD19+TLR-9+ [%] & TLR-9 serum concentration [ng/mL]                  | 0.816 | 5.471  | 0.000* |
| Lymphocytes [ $10^3/\text{mm}^3$ ] & T lymphocytes ratio CD3+CD4+/T CD3+CD8+       | 0.830 | 5.767  | 0.000* |
| Monocytes [ $10^3/\text{mm}^3$ ] & T lymphocytes ratio CD3+CD4+/T CD3+CD8+         | 0.833 | 5.834  | 0.000* |
| T lymphocytes CD8+TLR-9+ [%] & B lymphocytes CD19+TLR-9+ [%]                       | 0.846 | 6.135  | 0.000* |
| White blood cells [ $10^3/\text{mm}^3$ ] & T lymphocytes ratio CD3+CD4+/T CD3+CD8+ | 0.853 | 6.328  | 0.000* |
| DNA EBV copy number [copies/1 ug DNA] & B lymphocytes CD19+TLR-9+ [%]              | 0.854 | 6.348  | 0.000* |
| T lymphocytes CD8+TLR-9+ [%] & TLR-9 serum concentration [ng/mL]                   | 0.900 | 7.974  | 0.000* |
| NK cells CD3-CD16+CD56+ [%] & T lymphocytes CD3+CD8+ [%]                           | 0.946 | 11.311 | 0.000* |
| NKT-like cells CD3+CD16+CD56+ [%] & T lymphocytes CD3+CD8+ [%]                     | 0.948 | 11.522 | 0.000* |
| DNA EBV copy number [copies/1 ug DNA] & TLR-9 serum concentration [ng/mL]          | 0.955 | 12.531 | 0.000* |
| DNA EBV copy number [copies/1 ug DNA] & T lymphocytes CD8+TLR-9+ [%]               | 0.968 | 14.895 | 0.000* |
| Monocytes [ $10^3/\text{mm}^3$ ] & Lymphocytes [ $10^3/\text{mm}^3$ ]              | 0.977 | 17.861 | 0.000* |

|                                                                               |       |        |        |
|-------------------------------------------------------------------------------|-------|--------|--------|
| White blood cells [ $10^3/\text{mm}^3$ ] & Monocytes [ $10^3/\text{mm}^3$ ]   | 0.987 | 23.334 | 0.000* |
| White blood cells [ $10^3/\text{mm}^3$ ] & Lymphocytes [ $10^3/\text{mm}^3$ ] | 0.992 | 30.492 | 0.000* |
| NK cells CD3-CD16+CD56+ [%] & NKT-like cells CD3+CD16+CD56+ [%]               | 0.997 | 49.350 | 0.000* |

Supplementary Materials Table S9: Sperman's rank correlation analysis in GC-TNM I patients.

| Parameters                                                                   | R      | t(N-2) | p      |
|------------------------------------------------------------------------------|--------|--------|--------|
| T lymphocytes ratio CD3+CD4+/T CD3+CD8+ & T lymphocytes CD3+CD8+ [%]         | -0.964 | -8.141 | 0.000* |
| Survival time from diagnosis [months] & NKT-like cells CD3+CD16+CD56+ [%]    | -0.929 | -5.594 | 0.003* |
| NKT-like cells CD3+CD16+CD56+ [%] & Survival time from diagnosis [months]    | -0.929 | -5.594 | 0.003* |
| T lymphocytes CD3+CD8+ [%] & T lymphocytes CD3+CD4+ [%]                      | -0.929 | -5.594 | 0.003* |
| NKT-like cells CD3+CD16+CD56+ [%] & T lymphocytes ratio CD3+CD4+/T CD3+CD8+  | -0.893 | -4.433 | 0.007* |
| T lymphocytes ratio CD3+CD4+/T CD3+CD8+ & NKT-like cells CD3+CD16+CD56+ [%]  | -0.893 | -4.433 | 0.007* |
| NKT-like cells CD3+CD16+CD56+ [%] & T lymphocytes CD3+CD4+ [%]               | -0.857 | -3.721 | 0.014* |
| T lymphocytes CD3+CD4+ [%] & NKT-like cells CD3+CD16+CD56+ [%]               | -0.857 | -3.721 | 0.014* |
| White blood cells [ $10^3/\text{mm}^3$ ] & NKT-like cells CD3+CD16+CD56+ [%] | -0.786 | -2.840 | 0.036* |
| NK cells CD3-CD16+CD56+ [%] & White blood cells [ $10^3/\text{mm}^3$ ]       | -0.786 | -2.840 | 0.036* |
| T lymphocytes CD3+CD8+ [%] & T lymphocytes CD8+TLR-9+ [%]                    | -0.786 | -2.840 | 0.036* |
| NK cells CD3-CD16+CD56+ [%] & T lymphocytes CD3+CD8+ [%]                     | 0.786  | 2.840  | 0.036* |
| T lymphocytes CD3+CD8+ [%] & NK cells CD3-CD16+CD56+ [%]                     | 0.786  | 2.840  | 0.036* |

|                                                                                               |       |       |        |
|-----------------------------------------------------------------------------------------------|-------|-------|--------|
| T lymphocytes ratio CD3+CD4+/T CD3+CD8+ & T lymphocytes CD8+TLR-9+ [%]                        | 0.821 | 3.221 | 0.023* |
| Survival time from diagnosis [months] & White blood cells [10 <sup>3</sup> /mm <sup>3</sup> ] | 0.857 | 3.721 | 0.014* |
| T lymphocytes CD3+CD4+ [%] & T lymphocytes CD8+TLR-9+ [%]                                     | 0.929 | 5.594 | 0.003* |
| T lymphocytes CD3+CD4+ [%] & T lymphocytes ratio CD3+CD4+/T CD3+CD8+                          | 0.964 | 8.141 | 0.000* |

Supplementary Materials Table S10: Sperman's rank correlation analysis in GC-TNM II patients.

| Parameters                                                                                    | R      | t(N-2)  | p      |
|-----------------------------------------------------------------------------------------------|--------|---------|--------|
| White blood cells [10 <sup>3</sup> /mm <sup>3</sup> ] & NKT-like cells CD3+CD16+CD56+ [%]     | -0.979 | -15.194 | 0.000* |
| NKT-like cells CD3+CD16+CD56+ [%] & T lymphocytes ratio CD3+CD4+/T CD3+CD8+                   | -0.965 | -11.642 | 0.000* |
| T lymphocytes ratio CD3+CD4+/T CD3+CD8+ & NKT-like cells CD3+CD16+CD56+ [%]                   | -0.965 | -11.642 | 0.000* |
| White blood cells [10 <sup>3</sup> /mm <sup>3</sup> ] & NK cells CD3-CD16+CD56+ [%]           | -0.888 | -6.110  | 0.000* |
| NK cells CD3-CD16+CD56+ [%] & T lymphocytes ratio CD3+CD4+/T CD3+CD8+                         | -0.888 | -6.110  | 0.000* |
| White blood cells [10 <sup>3</sup> /mm <sup>3</sup> ] & T lymphocytes CD3+CD8+ [%]            | -0.874 | -5.691  | 0.000* |
| NKT-like cells CD3+CD16+CD56+ [%] & T lymphocytes CD3+CD4+ [%]                                | -0.825 | -4.619  | 0.001* |
| Survival time from diagnosis [months] & White blood cells [10 <sup>3</sup> /mm <sup>3</sup> ] | -0.783 | -3.984  | 0.003* |
| T lymphocytes CD3+CD4+ [%] & T lymphocytes CD3+CD8+ [%]                                       | -0.769 | -3.807  | 0.003* |
| NK cells CD3-CD16+CD56+ [%] & T lymphocytes CD3+CD4+ [%]                                      | -0.748 | -3.567  | 0.005* |
| Survival time from diagnosis [months] & T lymphocytes ratio CD3+CD4+/T CD3+CD8+               | -0.720 | -3.284  | 0.008* |
| Age & TLR-9 serum concentration [ng/mL]                                                       | -0.620 | -2.499  | 0.032* |



|                                                                                                 |       |       |        |
|-------------------------------------------------------------------------------------------------|-------|-------|--------|
| Survival time from diagnosis [months] & T lymphocytes CD3+CD8+ [%]                              | 0.636 | 2.609 | 0.026* |
| Monocytes [10 <sup>3</sup> /mm <sup>3</sup> ] & Lymphocytes [10 <sup>3</sup> /mm <sup>3</sup> ] | 0.755 | 3.644 | 0.005* |
| Survival time from diagnosis [months] & NKT-like cells CD3+CD16+CD56+ [%]                       | 0.762 | 3.724 | 0.004* |
| NKT-like cells CD3+CD16+CD56+ [%] & Survival time from diagnosis [months]                       | 0.762 | 3.724 | 0.004* |
| T lymphocytes CD3+CD4+ [%] & White blood cells [10 <sup>3</sup> /mm <sup>3</sup> ]              | 0.790 | 4.078 | 0.002* |
| NK cells CD3-CD16+CD56+ [%] & Survival time from diagnosis [months]                             | 0.797 | 4.176 | 0.002* |
| T lymphocytes CD3+CD8+ [%] & NK cells CD3-CD16+CD56+ [%]                                        | 0.853 | 5.172 | 0.000* |
| T lymphocytes ratio CD3+CD4+/T CD3+CD8+ & T lymphocytes CD3+CD4+ [%]                            | 0.867 | 5.505 | 0.000* |
| T lymphocytes CD3+CD8+ [%] & NKT-like cells CD3+CD16+CD56+ [%]                                  | 0.916 | 7.224 | 0.000* |
| NKT-like cells CD3+CD16+CD56+ [%] & NK cells CD3-CD16+CD56+ [%]                                 | 0.923 | 7.589 | 0.000* |
| T lymphocytes ratio CD3+CD4+/T CD3+CD8+ & White blood cells [10 <sup>3</sup> /mm <sup>3</sup> ] | 0.944 | 9.052 | 0.000* |

Supplementary Materials Table S11: Sperman's rank correlation analysis in GC-TNM III patients.

| Parameters                                                                                | R      | t(N-2)  | p      |
|-------------------------------------------------------------------------------------------|--------|---------|--------|
| White blood cells [10 <sup>3</sup> /mm <sup>3</sup> ] & NK cells CD3-CD16+CD56+ [%]       | -0.978 | -15.557 | 0.000* |
| White blood cells [10 <sup>3</sup> /mm <sup>3</sup> ] & NKT-like cells CD3+CD16+CD56+ [%] | -0.967 | -12.595 | 0.000* |
| T lymphocytes CD3+CD8+ [%] & T lymphocytes ratio CD3+CD4+/T CD3+CD8+                      | -0.945 | -9.588  | 0.000* |
| Survival time from diagnosis [months] & TLR-9 serum concentration [ng/mL]                 | -0.827 | -4.873  | 0.000* |
| NK cells CD3-CD16+CD56+ [%] & T lymphocytes ratio CD3+CD4+/T CD3+CD8+                     | -0.824 | -4.827  | 0.001* |
| Survival time from diagnosis [months] & DNA EBV copy number [copies/1 ug DNA]             | -0.811 | -4.600  | 0.001* |
| Lymphocytes [10 <sup>3</sup> /mm <sup>3</sup> ] & NK cells CD3-CD16+CD56+ [%]             | -0.791 | -4.291  | 0.001* |

|                                                                                    |        |        |        |
|------------------------------------------------------------------------------------|--------|--------|--------|
| White blood cells [ $10^3/\text{mm}^3$ ] & T lymphocytes CD3+CD8+ [%]              | -0.764 | -3.924 | 0.002* |
| Lymphocytes [ $10^3/\text{mm}^3$ ] & NKT-like cells CD3+CD16+CD56+ [%]             | -0.742 | -3.668 | 0.004* |
| Survival time from diagnosis [months] & T lymphocytes CD4+TLR-9+ [%]               | -0.727 | -3.510 | 0.005* |
| NKT-like cells CD3+CD16+CD56+ [%] & T lymphocytes ratio CD3+CD4+/T CD3+CD8+        | -0.709 | -3.332 | 0.007* |
| Lymphocytes [ $10^3/\text{mm}^3$ ] & T lymphocytes CD3+CD8+ [%]                    | -0.665 | -2.952 | 0.013* |
| Monocytes [ $10^3/\text{mm}^3$ ] & NKT-like cells CD3+CD16+CD56+ [%]               | -0.641 | -2.770 | 0.018* |
| Monocytes [ $10^3/\text{mm}^3$ ] & NK cells CD3-CD16+CD56+ [%]                     | -0.608 | -2.540 | 0.027* |
| T lymphocytes CD3+CD4+ [%] & T lymphocytes CD8+TLR-9+ [%]                          | -0.588 | -2.410 | 0.035* |
| Survival time from diagnosis [months] & T lymphocytes CD8+TLR-9+ [%]               | -0.555 | -2.212 | 0.049* |
| T lymphocytes CD3+CD4+ [%] & T lymphocytes ratio CD3+CD4+/T CD3+CD8+               | 0.555  | 2.212  | 0.049* |
| T lymphocytes CD4+TLR-9+ [%] & T lymphocytes CD8+TLR-9+ [%]                        | 0.637  | 2.743  | 0.019* |
| Lymphocytes [ $10^3/\text{mm}^3$ ] & T lymphocytes ratio CD3+CD4+/T CD3+CD8+       | 0.643  | 2.783  | 0.018* |
| B lymphocytes CD19+TLR-9+ [%] & TLR-9 serum concentration [ng/mL]                  | 0.643  | 2.783  | 0.018* |
| DNA EBV copy number [copies/1 ug DNA] & T lymphocytes CD8+TLR-9+ [%]               | 0.646  | 2.810  | 0.017* |
| NKT-like cells CD3+CD16+CD56+ [%] & T lymphocytes CD3+CD8+ [%]                     | 0.676  | 3.041  | 0.011* |
| T lymphocytes CD8+TLR-9+ [%] & TLR-9 serum concentration [ng/mL]                   | 0.720  | 3.439  | 0.006* |
| DNA EBV copy number [copies/1 ug DNA] & B lymphocytes CD19+TLR-9+ [%]              | 0.751  | 3.773  | 0.003* |
| White blood cells [ $10^3/\text{mm}^3$ ] & T lymphocytes ratio CD3+CD4+/T CD3+CD8+ | 0.775  | 4.064  | 0.002* |
| DNA EBV copy number [copies/1 ug DNA] & T lymphocytes CD4+TLR-9+ [%]               | 0.795  | 4.347  | 0.001* |
| T lymphocytes CD4+TLR-9+ [%] & TLR-9 serum concentration [ng/mL]                   | 0.808  | 4.543  | 0.001* |
| NK cells CD3-CD16+CD56+ [%] & T lymphocytes CD3+CD8+ [%]                           | 0.819  | 4.728  | 0.001* |
| White blood cells [ $10^3/\text{mm}^3$ ] & Lymphocytes [ $10^3/\text{mm}^3$ ]      | 0.835  | 5.036  | 0.000* |
| DNA EBV copy number [copies/1 ug DNA] & TLR-9 serum concentration [ng/mL]          | 0.949  | 9.995  | 0.000* |
| NK cells CD3-CD16+CD56+ [%] & NKT-like cells CD3+CD16+CD56+ [%]                    | 0.967  | 12.595 | 0.000* |

Supplementary Materials Table S12: Spearman's rank correlation analysis in GC-TNM IV patients.

| Parameters | R | t(N-2) | p |
|------------|---|--------|---|
|------------|---|--------|---|

|                                                                                           |        |         |        |
|-------------------------------------------------------------------------------------------|--------|---------|--------|
| DNA EBV copy number [copies/1 ug DNA] & NKT-like cells CD3+CD16+CD56+ [%]                 | -0.994 | -22.316 | 0.000* |
| Monocytes [10 <sup>3</sup> /mm <sup>3</sup> ] & NK cells CD3-CD16+CD56+ [%]               | -0.994 | -22.316 | 0.000* |
| Lymphocytes [10 <sup>3</sup> /mm <sup>3</sup> ] & NK cells CD3-CD16+CD56+ [%]             | -0.994 | -22.316 | 0.000* |
| NKT-like cells CD3+CD16+CD56+ [%] & DNA EBV copy number [copies/1 ug DNA]                 | -0.994 | -22.316 | 0.000* |
| NKT-like cells CD3+CD16+CD56+ [%] & White blood cells [10 <sup>3</sup> /mm <sup>3</sup> ] | -0.994 | -22.316 | 0.000* |
| Lymphocytes [10 <sup>3</sup> /mm <sup>3</sup> ] & NKT-like cells CD3+CD16+CD56+ [%]       | -0.982 | -12.709 | 0.000* |
| NKT-like cells CD3+CD16+CD56+ [%] & Monocytes [10 <sup>3</sup> /mm <sup>3</sup> ]         | -0.982 | -12.709 | 0.000* |
| NK cells CD3-CD16+CD56+ [%] & T lymphocytes CD8+TLR-9+ [%]                                | -0.976 | -11.024 | 0.000* |
| NKT-like cells CD3+CD16+CD56+ [%] & Neutrophils [10 <sup>3</sup> /mm <sup>3</sup> ]       | -0.970 | -9.787  | 0.000* |
| T lymphocytes CD8+TLR-9+ [%] & NKT-like cells CD3+CD16+CD56+ [%]                          | -0.970 | -9.787  | 0.000* |
| T lymphocytes CD4+TLR-9+ [%] & NK cells CD3-CD16+CD56+ [%]                                | -0.929 | -6.128  | 0.001* |
| T lymphocytes CD4+TLR-9+ [%] & NKT-like cells CD3+CD16+CD56+ [%]                          | -0.898 | -5.006  | 0.002* |
| NK cells CD3-CD16+CD56+ [%] & T lymphocytes CD3+ [%]                                      | -0.857 | -4.076  | 0.007* |
| NKT-like cells CD3+CD16+CD56+ [%] & T lymphocytes CD3+ [%]                                | -0.850 | -3.958  | 0.007* |
| NKT-like cells CD3+CD16+CD56+ [%] & TLR-9 serum concentration [ng/mL]                     | -0.826 | -3.594  | 0.011* |
| TLR-9 serum concentration [ng/mL] & NKT-like cells CD3+CD16+CD56+ [%]                     | -0.826 | -3.594  | 0.011* |
| B lymphocytes CD19+TLR-9+ [%] & NK cells CD3-CD16+CD56+ [%]                               | -0.810 | -3.378  | 0.015* |
| T lymphocytes CD3+CD8+ [%] & T lymphocytes ratio CD3+CD4+/T CD3+CD8+                      | -0.786 | -3.111  | 0.021* |
| TLR-9 serum concentration [ng/mL] & NK cells CD3-CD16+CD56+ [%]                           | -0.786 | -3.111  | 0.021* |
| T lymphocytes CD4+TLR-9+ [%] & Survival time from diagnosis [months]                      | -0.771 | -2.967  | 0.025* |
| Survival time from diagnosis [months] & T lymphocytes CD3+ [%]                            | -0.711 | -2.476  | 0.048* |
| Monocytes [10 <sup>3</sup> /mm <sup>3</sup> ] & TLR-9 serum concentration [ng/mL]         | 0.731  | 2.621   | 0.040* |
| TLR-9 serum concentration [ng/mL] & Monocytes [10 <sup>3</sup> /mm <sup>3</sup> ]         | 0.731  | 2.621   | 0.040* |
| T lymphocytes CD3+CD4+ [%] & TLR-9 serum concentration [ng/mL]                            | 0.738  | 2.680   | 0.037* |
| T lymphocytes CD8+TLR-9+ [%] & TLR-9 serum concentration [ng/mL]                          | 0.762  | 2.881   | 0.028* |
| B lymphocytes CD19+TLR-9+ [%] & TLR-9 serum concentration [ng/mL]                         | 0.762  | 2.881   | 0.028* |
| TLR-9 serum concentration [ng/mL] & B lymphocytes CD19+TLR-9+ [%]                         | 0.762  | 2.881   | 0.028* |
| White blood cells [10 <sup>3</sup> /mm <sup>3</sup> ] & TLR-9 serum concentration [ng/mL] | 0.786  | 3.111   | 0.021* |

|                                                                                                       |       |        |        |
|-------------------------------------------------------------------------------------------------------|-------|--------|--------|
| TLR-9 serum concentration [ng/mL] & DNA EBV copy number [copies/1 ug DNA]                             | 0.786 | 3.111  | 0.021* |
| Monocytes [10 <sup>3</sup> /mm <sup>3</sup> ] & B lymphocytes CD19+TLR-9+ [%]                         | 0.790 | 3.161  | 0.020* |
| B lymphocytes CD19+TLR-9+ [%] & Monocytes [10 <sup>3</sup> /mm <sup>3</sup> ]                         | 0.790 | 3.161  | 0.020* |
| DNA EBV copy number [copies/1 ug DNA] & B lymphocytes CD19+TLR-9+ [%]                                 | 0.810 | 3.378  | 0.015* |
| T lymphocytes ratio CD3+CD4+/T CD3+CD8+ & TLR-9 serum concentration [ng/mL]                           | 0.810 | 3.378  | 0.015* |
| B lymphocytes CD19+TLR-9+ [%] & White blood cells [10 <sup>3</sup> /mm <sup>3</sup> ]                 | 0.810 | 3.378  | 0.015* |
| T lymphocytes CD3+ [%] & T lymphocytes CD8+TLR-9+ [%]                                                 | 0.833 | 3.693  | 0.010* |
| T lymphocytes ratio CD3+CD4+/T CD3+CD8+ & T lymphocytes CD3+CD4+ [%]                                  | 0.833 | 3.693  | 0.010* |
| DNA EBV copy number [copies/1 ug DNA] & T lymphocytes CD3+ [%]                                        | 0.857 | 4.076  | 0.007* |
| White blood cells [10 <sup>3</sup> /mm <sup>3</sup> ] & T lymphocytes CD3+ [%]                        | 0.857 | 4.076  | 0.007* |
| T lymphocytes CD3+ [%] & White blood cells [10 <sup>3</sup> /mm <sup>3</sup> ]                        | 0.857 | 4.076  | 0.007* |
| T lymphocytes CD4+TLR-9+ [%] & T lymphocytes CD3+ [%]                                                 | 0.881 | 4.560  | 0.004* |
| Lymphocytes [10 <sup>3</sup> /mm <sup>3</sup> ] & T lymphocytes CD3+ [%]                              | 0.886 | 4.686  | 0.003* |
| T lymphocytes CD3+ [%] & Lymphocytes [10 <sup>3</sup> /mm <sup>3</sup> ]                              | 0.886 | 4.686  | 0.003* |
| T lymphocytes CD4+TLR-9+ [%] & T lymphocytes CD8+TLR-9+ [%]                                           | 0.905 | 5.203  | 0.002* |
| DNA EBV copy number [copies/1 ug DNA] & T lymphocytes CD4+TLR-9+ [%]                                  | 0.929 | 6.128  | 0.001* |
| T lymphocytes CD4+TLR-9+ [%] & DNA EBV copy number [copies/1 ug DNA]                                  | 0.929 | 6.128  | 0.001* |
| T lymphocytes CD8+TLR-9+ [%] & Neutrophils [10 <sup>3</sup> /mm <sup>3</sup> ]                        | 0.952 | 7.651  | 0.000* |
| T lymphocytes CD4+TLR-9+ [%] & Monocytes [10 <sup>3</sup> /mm <sup>3</sup> ]                          | 0.958 | 8.193  | 0.000* |
| Monocytes [10 <sup>3</sup> /mm <sup>3</sup> ] & T lymphocytes CD8+TLR-9+ [%]                          | 0.970 | 9.787  | 0.000* |
| T lymphocytes CD8+TLR-9+ [%] & Monocytes [10 <sup>3</sup> /mm <sup>3</sup> ]                          | 0.970 | 9.787  | 0.000* |
| T lymphocytes CD8+TLR-9+ [%] & DNA EBV copy number [copies/1 ug DNA]                                  | 0.976 | 11.024 | 0.000* |
| DNA EBV copy number [copies/1 ug DNA] & Monocytes [10 <sup>3</sup> /mm <sup>3</sup> ]                 | 0.994 | 22.316 | 0.000* |
| White blood cells [10 <sup>3</sup> /mm <sup>3</sup> ] & Monocytes [10 <sup>3</sup> /mm <sup>3</sup> ] | 0.994 | 22.316 | 0.000* |
| Monocytes [10 <sup>3</sup> /mm <sup>3</sup> ] & DNA EBV copy number [copies/1 ug DNA]                 | 0.994 | 22.316 | 0.000* |
| Lymphocytes [10 <sup>3</sup> /mm <sup>3</sup> ] & DNA EBV copy number [copies/1 ug DNA]               | 0.994 | 22.316 | 0.000* |
| NK cells CD3-CD16+CD56+ [%] & NKT-like cells CD3+CD16+CD56+ [%]                                       | 0.994 | 22.316 | 0.000* |
